## **IP<sub>3</sub>R2-independent Ca<sup>2+</sup> release from the endoplasmic reticulum in astrocytes**

Yohei Okubo<sup>1\*</sup>, Kazunori Kanemaru<sup>1,2</sup>, Junji Suzuki<sup>3</sup>, Kenta Kobayashi<sup>4,5</sup>, Kenzo Hirose<sup>6</sup> & Masamitsu Iino<sup>2\*</sup>

<sup>1</sup>Department of Pharmacology, Graduate School of Medicine, The University of Tokyo, Tokyo 133-0033, Japan

<sup>2</sup>Department of Cellular and Molecular Pharmacology, Nihon University School of Medicine, Tokyo 173-8610, Japan.

<sup>3</sup>Department of Physiology, University of California at San Francisco, San Francisco, CA 94143, USA

<sup>4</sup>Section of Viral Vector Development, National Institute for Physiological Sciences, Okazaki 444-8585, Japan.

<sup>5</sup>The Graduate University for Advanced Studies (SOKENDAI), Hayama 240-0193, Japan.

<sup>6</sup>Department of Neurobiology, Graduate School of Medicine, The University of Tokyo, Tokyo 133-0033, Japan

\*Corresponding authors: Yohei Okubo & Masamitsu Iino

YO: Department of Pharmacology, Graduate School of Medicine, The University of Tokyo, 7-3-1 Hongo, Bunkyo-ku, Tokyo 113-0033, Japan.

E-mail: yoheio@m.u-tokyo.ac.jp, Tel: +81-3-5841-3414, Fax: +81-3-5841-3390

MI: Department of Cellular and Molecular Pharmacology, Nihon University School of Medicine, 30-1, Oyaguchi Kami-cho, Itabashi-ku, Tokyo 173-8610, Japan.

E-mail: iino@m.u-tokyo.ac.jp, Tel: +81-3-3972-8111

The authors declare no competing financial interests.

## Abstract

Accumulating evidence indicates that astrocytes are actively involved in the physiological and pathophysiological functions of the brain. Intracellular  $\text{Ca}^{2+}$  signaling, especially  $\text{Ca}^{2+}$  release from the endoplasmic reticulum (ER), is considered to be crucial for the regulation of astrocytic functions. Mice with genetic deletion of  $\text{IP}_3\text{R}$  type 2 ( $\text{IP}_3\text{R}2$ ) are reportedly devoid of astrocytic  $\text{Ca}^{2+}$  signaling, and thus widely used to explore the roles of  $\text{Ca}^{2+}$  signaling in astrocytic functions. While functional deficits in  $\text{IP}_3\text{R}2$ -knockout (KO) mice have been found in some reports, no functional deficit was observed in others. Thus, there remains a controversy regarding the functional significance of astrocytic  $\text{Ca}^{2+}$  signaling. To address this controversy, we re-evaluated the assumption that  $\text{Ca}^{2+}$  release from the ER is abolished in  $\text{IP}_3\text{R}2$ -KO astrocytes using a highly sensitive imaging technique. We expressed the ER luminal  $\text{Ca}^{2+}$  indicator *G-CEPIA1 $_{er}$*  in cortical and hippocampal astrocytes to directly visualize spontaneous and stimulus-induced  $\text{Ca}^{2+}$  release from the ER. We found attenuated but significant  $\text{Ca}^{2+}$  release in response to application of norepinephrine to  $\text{IP}_3\text{R}2$ -KO astrocytes. This  $\text{IP}_3\text{R}2$ -independent  $\text{Ca}^{2+}$  release induced only minimal cytosolic  $\text{Ca}^{2+}$  transients but induced significant  $\text{Ca}^{2+}$  increases in mitochondria that are frequently in close contact with the ER. These results indicate that ER  $\text{Ca}^{2+}$  release is retained and is sufficient to increase the  $\text{Ca}^{2+}$  concentration in close proximity to the ER in  $\text{IP}_3\text{R}2$ -KO astrocytes.

## Introduction

Accumulating evidence indicates that astrocytes play not only trophic and supportive roles but also active roles in the physiological and pathophysiological functions of the brain (Volterra and Meldolesi, 2005; Barres, 2008). Therefore, clarifying the mechanisms for regulation of astrocytic functions has become a crucial issue in neuroscience. Intracellular  $\text{Ca}^{2+}$  signaling has attracted attention because astrocytes show robust spontaneous and stimulus-induced  $\text{Ca}^{2+}$  transients (Verkhratsky et al., 1998; Bazargani and Attwell, 2016).

$\text{Ca}^{2+}$  release from the endoplasmic reticulum (ER) via inositol 1,4,5-trisphosphate receptor ( $\text{IP}_3\text{R}$ ) has been recognized as a major component of spontaneous and  $\text{G}_q$ -coupled receptor-induced  $\text{Ca}^{2+}$  signaling in astrocytes. Therefore, to explore the significance of astrocytic  $\text{Ca}^{2+}$  signaling, mice with genetic deletion of  $\text{IP}_3\text{R}$  type 2 ( $\text{IP}_3\text{R}2$ ) (Li et al., 2005), which is enriched in astrocytes (Sharp et al., 1999; Holtzclaw et al., 2002; Zhang et al., 2014), have been widely used. In  $\text{IP}_3\text{R}2$ -knockout (KO) mice,  $\text{Ca}^{2+}$  transients in astrocytes were considered to be absent based on an imaging study of cytosolic  $\text{Ca}^{2+}$  transients by fluorescent  $\text{Ca}^{2+}$  indicator dyes (Petraovicz et al., 2008). Physiological and pathophysiological phenotypes have been observed in  $\text{IP}_3\text{R}2$ -KO mice, including plasticity and learning (Takata et al., 2011; Chen et al., 2012; Navarrete et al., 2012; Perez-Alvarez et al., 2014; Padmashri et al., 2015; Kim et al., 2016; Monai et al., 2016; Yang et al., 2016), homeostasis of  $\text{K}^+$  (Wang et al., 2012a, 2012b), pathogenesis of stroke, traumatic brain injury and neurodegenerative disease (Dong et al., 2013; Kanemaru et al., 2013; Li et al., 2015; Rakers and Petzold, 2016; Saito et al., 2018), and depression-like behaviors (Cao et al., 2013). However, several studies have reported no changes in basal synaptic activity and behavior (Petraovicz et al., 2008, 2014; Agulhon et al., 2013), hippocampal synaptic plasticity (Agulhon et al., 2010), and neurovascular coupling (Nizar et al., 2013; Takata et al., 2013; Bonder and McCarthy, 2014) in  $\text{IP}_3\text{R}2$ -KO mice. These contradictory results have caused confusion about the functional

significance of Ca<sup>2+</sup> signaling in astrocytes (Hamilton and Attwell, 2010; Fiacco and McCarthy, 2018; Savtchouk and Volterra, 2018).

One of the possible explanations that can resolve this controversy is that IP<sub>3</sub>R2-independent Ca<sup>2+</sup> signaling exists and contributes to the functions of IP<sub>3</sub>R2-KO astrocytes. In fact, recent studies using genetically encoded Ca<sup>2+</sup> indicators (GECIs) have clearly shown the presence of Ca<sup>2+</sup> signals in IP<sub>3</sub>R2-KO astrocytes (Kanemaru et al., 2014; Srinivasan et al., 2015; Rungta et al., 2016; Agarwal et al., 2017). These IP<sub>3</sub>R2-independent Ca<sup>2+</sup> transients were thought to be mediated by Ca<sup>2+</sup> influx via the plasma membrane (Shigetomi et al., 2012; Srinivasan et al., 2015; Rungta et al., 2016) or Ca<sup>2+</sup> release from mitochondria (Agarwal et al., 2017). These studies suggest that increases in the concentration of Ca<sup>2+</sup> originating from sources other than the ER may regulate the functions of astrocytes. However, it remains elusive whether ER Ca<sup>2+</sup> release is completely abolished in IP<sub>3</sub>R2-KO astrocytes.

We thus examined whether IP<sub>3</sub>R2-independent Ca<sup>2+</sup> release from the ER is present in IP<sub>3</sub>R2-KO astrocytes. Because cytosolic Ca<sup>2+</sup> transients can be generated by Ca<sup>2+</sup> derived from sources other than the ER, we directly detected ER Ca<sup>2+</sup> release as a decrease in the Ca<sup>2+</sup> concentration within the ER ([Ca<sup>2+</sup>]<sub>ER</sub>). We recently developed a series of calcium-measuring organelle-entrapped protein indicators (CEPIAs) that allow visualization of Ca<sup>2+</sup> dynamics within the ER and mitochondria with a high signal-to-noise ratio (Suzuki et al., 2014, 2016; Okubo et al., 2015). In this study, we expressed the ER Ca<sup>2+</sup> indicator G-CEPIA1<sub>er</sub> in cortical and hippocampal astrocytes of IP<sub>3</sub>R2-KO mice. We found attenuated but significant Ca<sup>2+</sup> release from the ER. We also used the mitochondrial Ca<sup>2+</sup> indicator CEPIA2<sub>mt</sub> and successfully observed significant Ca<sup>2+</sup> transfer into mitochondria from the ER in IP<sub>3</sub>R2-KO astrocytes. These findings allowed us to reinterpret the results from IP<sub>3</sub>R2-KO mice and shed new light on the significance of astrocytic Ca<sup>2+</sup> signaling.

## Materials and Methods

### *Animals*

All animal experiments were carried out in accordance with the regulations and guidelines of the Institutional Animal Care and Use Committee at The University of Tokyo and were approved by the Institutional Review Committee of the Graduate School of Medicine, The University of Tokyo. C57BL/6 mice were used as wild-type (WT) mice. IP<sub>3</sub>R2-KO mice (Li et al., 2005) were obtained from J. Chen (University of California at San Diego). Mice were kept under a 12 h light/dark cycle with *ad libitum* access to food and drinking water.

### *Preparation of viral vectors*

To generate adeno-associated viruses (AAVs) for astrocyte-specific expression of GECIs, the cytomegalovirus promoter of pAAV-MCS (AAV Helper Free Expression System, Cell Biolabs, Inc., San Diego, CA) was replaced with the gfaABC<sub>1</sub>D astrocyte-specific promoter derived from pZac2.1-gfaABC1D-Lck-GCaMP3 (Shigetomi et al., 2013). G-CEPIA1*er*, CEPIA2*mt*, GCaMP6f, and ER-YFP were inserted downstream of the gfaABC<sub>1</sub>D promoter to generate pAAV-gfaABC<sub>1</sub>D-G-CEPIA1*er*, pAAV-gfaABC<sub>1</sub>D-CEPIA2*mt*, pAAV-gfaABC<sub>1</sub>D-GCaMP6f, and pAAV-gfaABC<sub>1</sub>D-ER-YFP. AAV5 vectors were packaged using the AAV Helper Free Expression System. The packaging plasmids (pAAV-RC5 and pHelper) and transfer plasmid (pAAV-gfaABC<sub>1</sub>D-G-CEPIA1*er*, pAAV-gfaABC<sub>1</sub>D-CEPIA2*mt*, pAAV-gfaABC<sub>1</sub>D-GCaMP6f, or pAAV-gfaABC<sub>1</sub>D-ER-YFP) were transfected into HEK293T cells using the calcium phosphate method. The medium was replaced at 18 h after transfection with fresh medium, and the cells were incubated for 48 h. Harvested cells were lysed by repeated freezing and thawing, and a crude cell extract containing AAV5 vector particles was obtained. AAV5 vector particles were purified by ultracentrifugation with cesium chloride. The purified particles were dialyzed against PBS

and then concentrated by ultrafiltration using an Amicon 10K MWCO filter (Merck Millipore, Darmstadt, Germany). The copy number of the viral genome (vg) was determined by real-time quantitative PCR.

#### *AAV injection*

Male C57BL/6 mice or IP<sub>3</sub>R2-KO mice (postnatal day 56–120) were anesthetized with isoflurane (induction at 5%, maintenance at 1–2%, vol/vol, MK-A100, Muromachi, Kyoto, Japan). The mice were placed in a stereotaxic frame (SR-5M-HT, Narishige, Tokyo, Japan). The skull was thinned (about 1 mm in diameter) above the right parietal cortex using a burr powered by a high speed drill (ULTIMATE XL-D, NSK, Kanuma, Japan).

AAV5-gfaABC<sub>1</sub>D-G-CEPIA1<sub>er</sub> (0.98 or  $1.3 \times 10^{13}$  vg ml<sup>-1</sup>), AAV5-gfaABC<sub>1</sub>D-CEPIA2<sub>mt</sub> ( $0.98 \times 10^{13}$  vg ml<sup>-1</sup>), AAV5-gfaABC<sub>1</sub>D-GCaMP6f ( $1.1 \times 10^{13}$  vg ml<sup>-1</sup>), or pAAV-gfaABC<sub>1</sub>D-ER-YFP ( $3.0 \times 10^{13}$  vg ml<sup>-1</sup>) was unilaterally injected into the cortex (1.5–2 mm posterior to the bregma, 1–1.5 mm lateral to the midline, and 300 μm from the surface) or hippocampus (2 mm posterior to the bregma, 1.5 mm lateral to the midline, and 1.6 mm from the surface) through glass pipettes. A viral solution (1 μL) was delivered at a rate of 200 nL min<sup>-1</sup> using a micropump (Legato 130, KD scientific, Holliston, MA). Glass pipettes were left in place for at least 10 min. Mice were sacrificed at 14–28 days after AAV injection for imaging and immunohistochemistry.

#### *Preparation of brain slices and imaging*

Coronal cortical or hippocampal slices (300 μm in thickness) were prepared as described previously (Edwards et al., 1989). Slices were prepared in ice-cold artificial cerebrospinal fluid (ACSF) bubbled with 95% O<sub>2</sub> and 5% CO<sub>2</sub> using a vibrating slicer (PRO7, Dosaka, Kyoto, Japan). Slices were incubated in a holding chamber containing ACSF bubbled with

95% O<sub>2</sub> and 5% CO<sub>2</sub> at 35°C for 1 h and then returned to 23°C. ACSF contained (in mM) 125 NaCl, 2.5 KCl, 2 CaCl<sub>2</sub>, 1 MgSO<sub>4</sub>, 1.25 NaH<sub>2</sub>PO<sub>4</sub>, 26 NaHCO<sub>3</sub>, and 20 glucose. Imaging was carried out with a two-photon microscope (TSC MP5, Leica, Wetzlar, Germany) equipped with a water immersion objective (×25, NA 0.95, HCS IR APO, Leica) and Ti:sapphire laser (MaiTai DeepSee; Spectra Physics, Santa Clara, CA). Slices were transferred to a recording chamber under a microscope and continuously perfused with ACSF bubbled with 95% O<sub>2</sub> and 5% CO<sub>2</sub>. Tetrodotoxin (1 μM) was added to ACSF to inhibit neuronal activities throughout imaging. Norepinephrine (NE, 10 μM) and cyclopiazonic acid (CPA, 50 μM) were dissolved in ACSF and administered through the perfusion system of the recording chamber. The excitation wavelength was 900–920 nm. Emitted fluorescence was filtered by a 500–550 nm barrier filter and detected with photomultiplier tubes. Data were acquired in time lapse XY-scan mode (0.2–0.5 Hz). Experiments were carried out at room temperature (22–24°C).

### *Immunohistochemistry*

After anesthetization with pentobarbital, mice were fixed by perfusion of PBS containing 4% paraformaldehyde (PFA). The isolated brain was postfixed with 4% PFA for 1 h at 4°C and cryoprotected with 20% sucrose overnight. Brain sections (20 μm) prepared with a cryomicrotome (CM1200; Leica) were permeabilized and blocked with PBS containing 0.2% Triton X-100, 10% FBS, and 1% BSA for 1 h at room temperature. After incubation with antibodies for green fluorescent protein (monoclonal; GF090R, 1:100; NACALAI TESQUE) and glial fibrillary acidic protein (GFAP, polyclonal; G9269, 1:20; Sigma) overnight at 4°C, the sections were stained with Alexa Fluor 546- or 647-labeled goat anti-mouse or anti-rabbit IgG antibody (1:200; Invitrogen) for 1 h at room temperature. Sections were imaged using a confocal microscope (LEICA TCS SP8; Leica) equipped with an oil-immersion objective (63×, NA = 1.4).

### *Data analysis*

Data were analyzed using ImageJ software. Astrocytes were analyzed in layer 2/3 of the cortex or in the CA1 stratum radiatum of the hippocampus. Fluorescence intensities were corrected for background fluorescence by measuring a non-fluorescent area and normalized by the average of the first 10 or 20 frames to calculate the fractional changes in fluorescence intensity ( $\Delta F/F_0$ ). Spontaneous G-CEPIA1*er* responses were manually detected and analyzed. Fluorescence changes with a rate of decrease faster than  $-0.015 \Delta F/F_0 \text{ s}^{-1}$  and amplitude larger than  $-0.05 \Delta F/F_0$  were defined as responses. Synchronous decreases in G-CEPIA1*er* fluorescence throughout a single astrocyte were defined as global responses. Localized fluorescence decreases with about 10–15  $\mu\text{m}$  in diameter at the process region were defined as process-localized responses. The amplitude of spontaneous G-CEPIA1*er* responses was measured after smoothing time courses of  $\Delta F/F_0$  by a moving average with five frame windows. The amplitude of NE-induced G-CEPIA1*er*, CEPIA2*mt*, GCaMP6f, or ER-YFP responses was defined as the average of  $\Delta F/F_0$  within the 3-min time window starting from the start of NE application. The amplitude of the CPA-induced G-CEPIA1*er* fluorescence decrease was defined as the  $\Delta F/F_0$  value in a steady state.



## Results

### G-CEPIA1er detects Ca<sup>2+</sup> release from the ER in cortical astrocytes of IP<sub>3</sub>R2-KO mice

We used a serotype 5 AAV carrying the minimal astrocyte-specific gfaABC<sub>1</sub>D promoter to express G-CEPIA1er in astrocytes of the adult mouse cortex. Immunohistochemical analysis indicated co-localization of G-CEPIA1er and the astrocyte marker GFAP (Fig. 1A), confirming the astrocyte specificity of AAV5-gfaABC<sub>1</sub>D-mediated expression (Shigetomi et al., 2013). At subcellular levels, expression of G-CEPIA1er was observed throughout the soma and processes, although localization at the tips of ramified processes was unclear (Fig. 1A). This G-CEPIA1er distribution was consistent with a report on the distribution pattern of the ER in astrocytes (Patrushev et al., 2013).

To analyze Ca<sup>2+</sup> release from the ER, G-CEPIA1er-expressing layer 2/3 astrocytes in acute cortical slice preparations were imaged using a two-photon microscope. Application of CPA, a sarco/endoplasmic reticulum Ca<sup>2+</sup>-ATPase (SERCA) inhibitor, was used to deplete Ca<sup>2+</sup> within the ER. CPA-induced Ca<sup>2+</sup> depletion resulted in a marked decrease in the G-CEPIA1er fluorescence intensity of both WT and IP<sub>3</sub>R2-KO astrocytes, confirming that G-CEPIA1er reports ER Ca<sup>2+</sup> levels (Fig. 1B). There was no significant difference in the amplitudes of the CPA-induced G-CEPIA1er fluorescence decrease between WT and IP<sub>3</sub>R2-KO astrocytes, indicating that the basal [Ca<sup>2+</sup>]<sub>ER</sub> in IP<sub>3</sub>R2-KO astrocytes was similar to that in WT astrocytes (Fig. 1B). However, the rate of decrease in [Ca<sup>2+</sup>]<sub>ER</sub> was greater in WT astrocytes than in IP<sub>3</sub>R2-KO astrocytes (Fig. 1B). In WT astrocytes, [Ca<sup>2+</sup>]<sub>ER</sub> was often decreased in a stepwise manner as shown in Fig. 1B. Each step appeared to reflect spontaneous Ca<sup>2+</sup> release events via IP<sub>3</sub>R2 as described in the following.

We next investigated G<sub>q</sub>-coupled receptor-induced Ca<sup>2+</sup> release from the ER in astrocytes. NE, which is released from the axons of locus coeruleus neurons, induces significant ER Ca<sup>2+</sup> release through activation of α<sub>1</sub>-adrenergic receptors in astrocytes *in vivo*

(Ding et al., 2013; Paukert et al., 2014; Srinivasan et al., 2015). Although previous studies have shown that NE-induced  $\text{Ca}^{2+}$  release is absent in  $\text{IP}_3\text{R2-KO}$  astrocytes, we re-evaluated this result using *G-CEPIA1er*. Bath application of NE (10  $\mu\text{M}$ ) induced a large decrease in  $[\text{Ca}^{2+}]_{\text{ER}}$  of WT astrocytes, indicating robust  $\text{Ca}^{2+}$  release from the ER (Fig. 2A and B). Following washout of NE, there was slow recovery of  $[\text{Ca}^{2+}]_{\text{ER}}$  due to  $\text{Ca}^{2+}$  reuptake by the ER. The time course was consistent with ER  $\text{Ca}^{2+}$  dynamics induced by  $\text{IP}_3\text{R}$ -mediated  $\text{Ca}^{2+}$  release in other cell types shown in our previous studies (Suzuki et al., 2014; Okubo et al., 2015). NE-induced  $[\text{Ca}^{2+}]_{\text{ER}}$  responses showed almost the same amplitude and time course in the soma and processes, indicating induction of cell-wide  $\text{Ca}^{2+}$  releases in response to bath application of NE (Fig. 2A, B and D). To our surprise, NE application induced a smaller but significant decrease in  $[\text{Ca}^{2+}]_{\text{ER}}$  of  $\text{IP}_3\text{R2-KO}$  astrocytes throughout the soma and processes (Fig. 2A, B and D). This observation clearly indicates that ER  $\text{Ca}^{2+}$  release is not completely abolished in  $\text{IP}_3\text{R2-KO}$  astrocytes.

Most GECIs including *G-CEPIA1er* are sensitive to pH. To exclude the possibility that the observed changes in the *G-CEPIA1er* fluorescence intensity was due to a change in pH within the ER, we expressed ER-localized YFP that is sensitive to pH but insensitive to  $\text{Ca}^{2+}$  (Suzuki et al., 2014). ER-YFP showed no response to NE in either WT or  $\text{IP}_3\text{R2-KO}$  astrocytes, confirming that NE-induced *G-CEPIA1er* responses reflected decreases in  $[\text{Ca}^{2+}]_{\text{ER}}$  (Fig. 2C and D).

### ***G-CEPIA1er* detects spontaneous $\text{Ca}^{2+}$ release in WT astrocytes**

During our observation of  $[\text{Ca}^{2+}]_{\text{ER}}$  in WT astrocytes, we found spontaneous decreases in  $[\text{Ca}^{2+}]_{\text{ER}}$  (Fig. 3). There were two types of spontaneous events: a “global” response that showed a synchronous decrease in  $[\text{Ca}^{2+}]_{\text{ER}}$  throughout the astrocyte (Fig. 3A and D), and a “process-localized” response that was localized at processes with diameters of about 10–15

$\mu\text{m}$  (Fig. 3B and D). These  $\text{Ca}^{2+}$  release dynamics may at least partly correspond to cell-wide and localized  $\text{Ca}^{2+}$  signals imaged by cytosolic  $\text{Ca}^{2+}$  indicators in previous studies (Kanemaru et al., 2014; Srinivasan et al., 2015), although precise correlations require further analyses. However, we did not find spontaneous  $[\text{Ca}^{2+}]_{\text{ER}}$  responses in  $\text{IP}_3\text{R2-KO}$  astrocytes (Fig. 3C). Thus, in  $\text{IP}_3\text{R2-KO}$  astrocytes, spontaneous  $\text{Ca}^{2+}$  release events, if any, appeared to be attenuated to a level undetectable by *G-CEPIA1er*.

### **Cytosolic $\text{Ca}^{2+}$ transients are mediated by $\text{IP}_3\text{R2}$ -independent $\text{Ca}^{2+}$ release**

To clarify the significance of  $\text{IP}_3\text{R2}$ -independent  $\text{Ca}^{2+}$  release in the intracellular  $\text{Ca}^{2+}$  signaling of astrocytes, we investigated changes in the cytosolic  $\text{Ca}^{2+}$  concentration ( $[\text{Ca}^{2+}]_{\text{Cyt}}$ ) in response to NE application (Fig. 4). Cytosolic  $\text{Ca}^{2+}$  indicator *GCaMP6f* (Chen et al., 2013) was expressed in astrocytes using an AAV, showing a diffuse distribution throughout the cytosol (Fig. 4A). Application of NE induced large and cell-wide  $[\text{Ca}^{2+}]_{\text{Cyt}}$  responses in WT astrocytes (Fig. 4B and C). These NE-induced  $[\text{Ca}^{2+}]_{\text{Cyt}}$  responses showed no significant subcellular distribution, but were synchronized throughout the cell. Responses were abolished after treatment with CPA, indicating a critical contribution of ER  $\text{Ca}^{2+}$  release to NE-induced  $[\text{Ca}^{2+}]_{\text{Cyt}}$  transients (Fig. 4B and C). We also observed spontaneous and spatially confined  $[\text{Ca}^{2+}]_{\text{Cyt}}$  responses that probably correspond to previously reported “ $\text{Ca}^{2+}$  twinkle” or “microdomain”  $\text{Ca}^{2+}$  signals (Kanemaru et al., 2014; Srinivasan et al., 2015). These localized  $[\text{Ca}^{2+}]_{\text{Cyt}}$  signals hardly contributed to  $\Delta F/F_0$  traces of *GCaMP6f* averaged within the entire cell.

In  $\text{IP}_3\text{R2-KO}$  astrocytes, NE induced very small  $[\text{Ca}^{2+}]_{\text{Cyt}}$  responses (Fig. 4B and C). Only very few  $\text{IP}_3\text{R2-KO}$  astrocytes showed clear but relatively small responses. These  $[\text{Ca}^{2+}]_{\text{Cyt}}$  responses in  $\text{IP}_3\text{R2-KO}$  astrocytes were also abolished after treatment with CPA (Fig.

4B and C). These results indicate that IP<sub>3</sub>R2-independent Ca<sup>2+</sup> release, which was detected by G-CEPIA1er, did not always increase [Ca<sup>2+</sup>]<sub>Cyt</sub> to a level detectable by GCaMP6f.

### **Significant Ca<sup>2+</sup> transients in mitochondria are mediated by IP<sub>3</sub>R2-independent Ca<sup>2+</sup> release**

We next examined whether IP<sub>3</sub>R2-independent Ca<sup>2+</sup> release contributed to astrocytic Ca<sup>2+</sup> signaling other than cell-wide cytosolic Ca<sup>2+</sup> transients. To this end, we focused on mitochondria. The ER and mitochondria often form close contacts where Ca<sup>2+</sup> is efficiently transferred from the ER to mitochondria without a global increase in [Ca<sup>2+</sup>]<sub>Cyt</sub> (Rizzuto et al., 1998; de Brito and Scorrano, 2010; Hirabayashi et al., 2017). We thus investigated changes in the Ca<sup>2+</sup> concentration within mitochondria ([Ca<sup>2+</sup>]<sub>Mito</sub>) using CEPIA2mt, a Ca<sup>2+</sup> indicator for the mitochondrial matrix (Suzuki et al., 2014) (Fig. 5). AAV-mediated expression of CEPIA2mt in astrocytes resulted in a punctate distribution of fluorescence, which was consistent with the morphology of mitochondria (Fig. 5A). Application of NE to release Ca<sup>2+</sup> from the ER induced an increase in [Ca<sup>2+</sup>]<sub>Mito</sub> of WT astrocytes (Fig. 5B and C). A fraction of WT astrocytes did not show a response as observed in HeLa cells in our previous study (Suzuki et al., 2014) (Fig. 5B and C). The NA-induced [Ca<sup>2+</sup>]<sub>Mito</sub> response was abolished after treatment with CPA to deplete the ER (Fig. 5B and C). These results indicate that Ca<sup>2+</sup> enters mitochondria following Ca<sup>2+</sup> release from the ER in WT astrocytes. We did not observe subcellular heterogeneity in the NE-induced [Ca<sup>2+</sup>]<sub>Mito</sub> responses.

Of note, NE also induced [Ca<sup>2+</sup>]<sub>Mito</sub> responses in IP<sub>3</sub>R2-KO astrocytes (Fig. 5B and C). Similar to WT astrocytes, a fraction of IP<sub>3</sub>R2-KO astrocytes showed no responses. Compared with the minimal [Ca<sup>2+</sup>]<sub>Cyt</sub> responses, [Ca<sup>2+</sup>]<sub>Mito</sub> showed attenuated but significant responses in IP<sub>3</sub>R2-KO astrocytes in response to NE. These [Ca<sup>2+</sup>]<sub>Mito</sub> responses in IP<sub>3</sub>R2-KO astrocytes were also abolished after treatment with CPA (Fig. 5B and C). These results indicate that

IP<sub>3</sub>R2-independent Ca<sup>2+</sup> release efficiently induces an increase in [Ca<sup>2+</sup>]<sub>Mito</sub>, and suggest that IP<sub>3</sub>R2-independent Ca<sup>2+</sup> release increases the local Ca<sup>2+</sup> concentration in the vicinity of the ER.

### **IP<sub>3</sub>R2-independent Ca<sup>2+</sup> release in hippocampal astrocytes**

Regional differences in the properties of astrocytes have been reported (Chai et al., 2017). To investigate whether IP<sub>3</sub>R2-independent Ca<sup>2+</sup> release could be observed in astrocytes of brain regions other than the cortex, we visualized Ca<sup>2+</sup> release from the ER in hippocampal astrocytes (Fig. 6). G-CEPIA1*er* was expressed in hippocampal astrocytes using an AAV. G-CEPIA1*er*-expressing astrocytes in the CA1 stratum radiatum of acute hippocampal slice preparations were imaged by two-photon microscopy. “Global” and “process localized” spontaneous G-CEPIA1*er* responses were observed in WT astrocytes, but not in IP<sub>3</sub>R2-KO astrocytes, which was consistent with the results in cortical astrocytes (Fig. 6A–D). Application of NE induced large G-CEPIA1*er* responses in WT astrocytes, whereas attenuated but significant G-CEPIA1*er* responses were observed in IP<sub>3</sub>R2-KO astrocytes (Fig. 6E). Therefore, IP<sub>3</sub>R2-independent Ca<sup>2+</sup> release was commonly observed in cortical and hippocampal astrocytes of IP<sub>3</sub>R2-KO mice.

## Discussion

In this study, we showed  $\text{Ca}^{2+}$  release from the ER in  $\text{IP}_3\text{R2-KO}$  astrocytes for the first time. This  $\text{IP}_3\text{R2}$ -independent  $\text{Ca}^{2+}$  release was effective to increase the  $\text{Ca}^{2+}$  concentration within mitochondria that make close contacts with the ER. These results provide new insights into the functional significance of ER  $\text{Ca}^{2+}$  release in astrocytes. The controversy derived from the assumption that ER  $\text{Ca}^{2+}$  release is abolished in  $\text{IP}_3\text{R2-KO}$  astrocytes should be re-evaluated considering the presence of  $\text{IP}_3\text{R2}$ -independent  $\text{Ca}^{2+}$  release.

### Highly sensitive and specific detection of ER $\text{Ca}^{2+}$ release using G-CEPIA1er

Although  $\text{IP}_3\text{R2}$ -independent  $\text{Ca}^{2+}$  release from the ER in  $\text{IP}_3\text{R2-KO}$  astrocytes was detectable by G-CEPIA1er responses, the resulting changes in  $[\text{Ca}^{2+}]_{\text{Cyt}}$  were only barely detected by GCaMP6f responses. The difficulty in detecting the  $[\text{Ca}^{2+}]_{\text{Cyt}}$  response is consistent with previous reports that failed to detect evoked  $[\text{Ca}^{2+}]_{\text{Cyt}}$  responses in  $\text{IP}_3\text{R2-KO}$  astrocytes (Petraevicz et al., 2008, 2014, Agulhon et al., 2010, 2013; Nizar et al., 2013; Takata et al., 2013). These results suggest that the amount of  $\text{Ca}^{2+}$  release sufficient to change free  $[\text{Ca}^{2+}]_{\text{ER}}$  is often insufficient to change free  $[\text{Ca}^{2+}]_{\text{Cyt}}$ . There appear to be some potential reasons. First, the volume occupied by the smooth ER is about 10% of the cytoplasm (Paumgartner et al., 1981). Therefore,  $\text{Ca}^{2+}$  released from the ER is diluted in the cytosol. Another possible reason is the  $\text{Ca}^{2+}$  buffering capacity  $k$  (a change in the total  $\text{Ca}^{2+}$  concentration in a subcellular compartment divided by the corresponding change in free  $\text{Ca}^{2+}$  concentration in the compartment). In many cell types, cytosolic  $k$  is estimated to be 10–1000 (Neher, 1995; Mogami et al., 1999). In pancreatic acinar cells,  $k$  of the ER is estimated to be two orders of magnitude smaller than that of cytosol (Mogami et al., 1999). If  $k$  is similarly lower in the ER than in the cytosol, this would also reduce the change in  $[\text{Ca}^{2+}]_{\text{Cyt}}$ . Therefore, G-CEPIA1er is expected to report ER  $\text{Ca}^{2+}$  release with higher sensitivity than cytosolic  $\text{Ca}^{2+}$  indicators.

Furthermore, G-CEPIA1*er* can specifically detect ER Ca<sup>2+</sup> release, whereas cytosolic Ca<sup>2+</sup> indicators do not specify the source of Ca<sup>2+</sup>.

### **Ca<sup>2+</sup> channels that mediate IP<sub>3</sub>R2-independent Ca<sup>2+</sup> release**

Although IP<sub>3</sub>R2 is the major ER Ca<sup>2+</sup> release channel in astrocytes, expression of IP<sub>3</sub>R1 and/or IP<sub>3</sub>R3 in astrocytes has been indicated by transcriptome analyses (Cahoy et al., 2008; Zhang et al., 2014; Chai et al., 2017) and immunohistochemical studies (Yamamoto-Hino et al., 1995; Sharp et al., 1999). Furthermore, comparison between IP<sub>3</sub>R2-KO mice and IP<sub>3</sub>R2/IP<sub>3</sub>R3-double KO mice indicate a functional contribution of IP<sub>3</sub>R3 to astrocytic Ca<sup>2+</sup> signaling, albeit small (Tamamushi et al., 2012; Sherwood et al., 2017). These previous studies suggest the presence of IP<sub>3</sub>-induced Ca<sup>2+</sup> release via IP<sub>3</sub>R1 and/or IP<sub>3</sub>R3 in IP<sub>3</sub>R2-KO astrocytes.

In addition, expression of ryanodine receptor type3 (RyR3) in astrocytes has been reported (Matyash et al., 2002; Chai et al., 2017). Furthermore, the functional significance of RyR3 was reported in both astrocytic Ca<sup>2+</sup> signaling and motility (Matyash et al., 2002). Therefore, it also appears possible that Ca<sup>2+</sup>-induced Ca<sup>2+</sup> release via RyR3 enhances Ca<sup>2+</sup> release from the ER in collaboration with IP<sub>3</sub>R1 and/or IP<sub>3</sub>R3-dependent Ca<sup>2+</sup> release in astrocytes.

### **Contribution of IP<sub>3</sub>R2-independent Ca<sup>2+</sup> release to Ca<sup>2+</sup> signaling in IP<sub>3</sub>R2-KO astrocytes**

When the extent of the NE-induced increase in Ca<sup>2+</sup> concentration was compared between WT and IP<sub>3</sub>R2-KO astrocytes, there was a much higher Ca<sup>2+</sup> increase in mitochondria than in the cytoplasm of IP<sub>3</sub>R2-KO astrocytes (Figs. 4 and 5). These results suggest a mechanism that allows privileged transfer of Ca<sup>2+</sup> from the ER to mitochondria. Indeed, it has been shown

that the ER and mitochondria make close contacts (10–30 nm in distance), and that such contact sites are crucial for efficient  $\text{Ca}^{2+}$  transfer (Rizzuto et al., 1998; de Brito and Scorrano, 2010; Hirabayashi et al., 2017). This finding suggests that  $\text{IP}_3\text{R}2$ -independent  $\text{Ca}^{2+}$  release is capable of increasing  $[\text{Ca}^{2+}]_{\text{Cyt}}$  within close proximity to the ER membrane, generating  $\text{Ca}^{2+}$  nanodomains around the ER (Rizzuto and Pozzan, 2006). Thus, in addition to extracellular and mitochondrial sources of  $\text{Ca}^{2+}$  for localized  $\text{Ca}^{2+}$  signaling (Srinivasan et al., 2015; Agarwal et al., 2017),  $\text{IP}_3\text{R}2$ -independent  $\text{Ca}^{2+}$  release may contribute to  $\text{Ca}^{2+}$  signaling in  $\text{IP}_3\text{R}2$ -KO astrocytes.

We also noted the spatial distribution of  $\text{IP}_3\text{R}2$ -independent  $\text{Ca}^{2+}$  release, which was observed throughout the cell including the soma and processes in NE-stimulated  $\text{IP}_3\text{R}2$ -KO astrocytes (Fig. 2). This compares with the subcellular-confined  $\text{Ca}^{2+}$  signals within the processes due to  $\text{Ca}^{2+}$  influx from the extracellular space or  $\text{Ca}^{2+}$  release from mitochondria in  $\text{IP}_3\text{R}2$ -KO astrocytes in the absence of agonist stimulation (Kanemaru et al., 2014; Srinivasan et al., 2015; Agarwal et al., 2017). Therefore,  $\text{IP}_3\text{R}2$ -independent  $\text{Ca}^{2+}$  release may have distinct roles, especially in the somatic region of  $\text{IP}_3\text{R}2$ -KO astrocytes.

### **Reinterpretation of astrocytic functions in $\text{IP}_3\text{R}2$ -KO mice**

It has been assumed that  $\text{Ca}^{2+}$  release from the ER is absent in  $\text{IP}_3\text{R}2$ -KO astrocytes. Thus, the absence of functional deficits in  $\text{IP}_3\text{R}2$ -KO mice (Petraovicz et al., 2008, 2014, Agulhon et al., 2010, 2013; Nizar et al., 2013; Takata et al., 2013; Bonder and McCarthy, 2014) has been considered to indicate the absence of functional roles of intracellular  $\text{Ca}^{2+}$  release in astrocytes. The presence of  $\text{IP}_3\text{R}2$ -independent  $\text{Ca}^{2+}$  release may necessitate reinterpretation of such results.

$\text{Ca}^{2+}$  release from the ER may be inhibited by expressing the  $\text{IP}_3$  hydrolyzing enzyme,  $\text{IP}_3$  5-phosphatase (5ppase) (Kanemaru et al., 2007; Mashimo et al., 2010; Foley et al., 2017).



Indeed, exogenous expression of 5ppase effectively suppresses IP<sub>3</sub> production following IP<sub>3</sub>R-dependent Ca<sup>2+</sup> release in astrocytes (Kanemaru et al., 2007; Mashimo et al., 2010). Because 5ppase is expected to suppress IP<sub>3</sub>R-induced Ca<sup>2+</sup> release regardless of IP<sub>3</sub>R subtypes, the phenotypic difference between 5ppase-expressing mice and IP<sub>3</sub>R2-KO mice may clarify the role of IP<sub>3</sub>R2-independent Ca<sup>2+</sup> release. In fact, a recent study has indicated that astrocytic expression of 5ppase disrupts sleep (Foley et al., 2017), whereas sleep disruption was not observed in IP<sub>3</sub>R2-KO mice (Cao et al., 2013). Although there remains the possibility of developmental adaptation or other compensatory mechanisms in these mice, the results suggest that residual Ca<sup>2+</sup> signaling, including IP<sub>3</sub>R2-independent Ca<sup>2+</sup> release in IP<sub>3</sub>R2-KO mice, accounts for the absence of functional deficits in IP<sub>3</sub>R2-KO mice.

In conclusion, the presence of IP<sub>3</sub>R2-independent Ca<sup>2+</sup> release as well as Ca<sup>2+</sup> signaling generated by sources other than the ER limit the use of IP<sub>3</sub>R2-KO mice to assess the role of Ca<sup>2+</sup> signaling in astrocytic functions when functional deficits are not observed in the mutant mice. This notion may help to resolve the long-lasting controversy arising from the assumption that Ca<sup>2+</sup> signaling is abolished in IP<sub>3</sub>R2-KO astrocytes. Furthermore, the present results facilitate the study of the functional roles of Ca<sup>2+</sup> signaling in close proximity to the ER in astrocytes.

## **Acknowledgements**

We thank Y. Kawashima for technical assistance and Dr. B. Khakh (University of California at San Francisco) for providing the pZac2.1-gfaABC1D-Lck-GCaMP3 plasmid. This work was supported by the Japan Society for the Promotion of Science (JSPS) KAKENHI [Grant Numbers JP16K08543 (Y.O.), JP15H05648 (K.K.), and JP21229004 and JP25221304 (M.I.)] and grants from the Tokyo Society of Medical Sciences (Y.O.).

## References

- Agarwal A, Wu P-H, Hughes EG, Fukaya M, Tischfield MA, Langseth AJ, Wirtz D, Bergles DE (2017) Transient opening of the mitochondrial permeability transition pore induces microdomain calcium transients in astrocyte processes. *Neuron* 93:587–605.
- Agulhon C, Boyt KM, Xie AX, Friocourt F, Roth BL, McCarthy KD (2013) Modulation of the autonomic nervous system and behaviour by acute glial cell G<sub>q</sub> protein-coupled receptor activation in vivo. *J Physiol* 591:5599–5609.
- Agulhon C, Fiacco TA, McCarthy KD (2010) Hippocampal short- and long-term plasticity are not modulated by astrocyte Ca<sup>2+</sup> signaling. *Science* (80- ) 327:1250–1254.
- Barres BA (2008) The mystery and magic of glia: a perspective on their roles in health and disease. *Neuron* 60:430–440.
- Bazargani N, Attwell D (2016) Astrocyte calcium signaling: the third wave. *Nat Neurosci* 19:182–189.
- Bonder DE, McCarthy KD (2014) Astrocytic G<sub>q</sub>-GPCR-linked IP<sub>3</sub>R-dependent Ca<sup>2+</sup> signaling does not mediate neurovascular coupling in mouse visual cortex *in vivo*. *J Neurosci* 34:13139–13150.
- Cahoy JD, Emery B, Kaushal A, Foo LC, Zamanian JL, Christopherson KS, Xing Y, Lubischer JL, Krieg PA, Krupenko SA, Thompson WJ, Barres BA (2008) A transcriptome database for astrocytes, neurons, and oligodendrocytes: a new resource for understanding brain development and function. *J Neurosci* 28:264–278.
- Cao X, Li L-P, Wang Q, Wu Q, Hu H-H, Zhang M, Fang Y-Y, Zhang J, Li S-J, Xiong W-C, Yan H-C, Gao Y-B, Liu J-H, Li X-W, Sun L-R, Zeng Y-N, Zhu X-H, Gao T-M (2013) Astrocyte-derived ATP modulates depressive-like behaviors. *Nat Med* 19:773–777.
- Chai H, Diaz-Castro B, Shigetomi E, Monte E, Oceau JC, Yu X, Cohn W, Rajendran PS, Vondriska TM, Whitelegge JP, Coppola G, Khakh BS (2017) Neural circuit-specialized astrocytes: transcriptomic, proteomic, morphological, and functional evidence. *Neuron* 95:531–549.
- Chen N, Sugihara H, Sharma J, Perea G, Petravicz J, Le C, Sur M (2012) Nucleus basalis-enabled stimulus-specific plasticity in the visual cortex is mediated by astrocytes. *Proc Natl Acad Sci* 109:E2832–E2841.
- Chen T-W, Wardill TJ, Sun Y, Pulver SR, Renninger SL, Baohan A, Schreiter ER, Kerr RA, Orger MB, Jayaraman V, Looger LL, Svoboda K, Kim DS (2013) Ultrasensitive fluorescent proteins for imaging neuronal activity. *Nature* 499:295–300.
- de Brito OM, Scorrano L (2010) An intimate liaison: spatial organization of the endoplasmic reticulum-mitochondria relationship. *EMBO J* 29:2715–2723.

- Ding F, O'Donnell J, Thrane AS, Zeppenfeld D, Kang H, Xie L, Wang F, Nedergaard M (2013)  $\alpha$ 1-Adrenergic receptors mediate coordinated  $\text{Ca}^{2+}$  signaling of cortical astrocytes in awake, behaving mice. *Cell Calcium* 54:387–394.
- Dong Q, He J, Chai Z (2013) Astrocytic  $\text{Ca}^{2+}$  waves mediate activation of extrasynaptic NMDA receptors in hippocampal neurons to aggravate brain damage during ischemia. *Neurobiol Dis* 58:68–75.
- Edwards FA, Konnerth A, Sakmann B, Takahashi T (1989) A thin slice preparation for patch clamp recordings from neurones of the mammalian central nervous system. *Pflugers Arch* 414:600–612.
- Fiacco TA, McCarthy KD (2018) Multiple lines of evidence indicate that gliotransmission does not occur under physiological conditions. *J Neurosci* 38:3–13.
- Foley J, Blutstein T, Lee S, Erneux C, Halassa MM, Haydon P (2017) Astrocytic  $\text{IP}_3/\text{Ca}^{2+}$  signaling modulates theta rhythm and REM sleep. *Front Neural Circuits* 11:3.
- Hamilton NB, Attwell D (2010) Do astrocytes really exocytose neurotransmitters? *Nat Rev Neurosci* 11:227–238.
- Hirabayashi Y, Kwon S-K, Paek H, Pernice WM, Paul MA, Lee J, Erfani P, Raczkowski A, Petrey DS, Pon LA, Polleux F (2017) ER-mitochondria tethering by PDZD8 regulates  $\text{Ca}^{2+}$  dynamics in mammalian neurons. *Science* 358:623–630.
- Holtzclaw LA, Pandhit S, Bare DJ, Mignery GA, Russell JT (2002) Astrocytes in adult rat brain express type 2 inositol 1,4,5-trisphosphate receptors. *Glia* 39:69–84.
- Kanemaru K, Kubota J, Sekiya H, Hirose K, Okubo Y, Iino M (2013) Calcium-dependent N-cadherin up-regulation mediates reactive astrogliosis and neuroprotection after brain injury. *Proc Natl Acad Sci* 110:11612–11617.
- Kanemaru K, Okubo Y, Hirose K, Iino M (2007) Regulation of neurite growth by spontaneous  $\text{Ca}^{2+}$  oscillations in astrocytes. *J Neurosci* 27:8957–8966.
- Kanemaru K, Sekiya H, Xu M, Satoh K, Kitajima N, Yoshida K, Okubo Y, Sasaki T, Moritoh S, Hasuwa H, Mimura M, Horikawa K, Matsui K, Nagai T, Iino M, Tanaka KF (2014) *In vivo* visualization of subtle, transient, and local activity of astrocytes using an ultrasensitive  $\text{Ca}^{2+}$  indicator. *Cell Rep* 8:311–318.
- Kim SK, Hayashi H, Ishikawa T, Shibata K, Shigetomi E, Shinozaki Y, Inada H, Roh SE, Kim SJ, Lee G, Bae H, Moorhouse AJ, Mikoshiba K, Fukazawa Y, Koizumi S, Nabekura J (2016) Cortical astrocytes rewire somatosensory cortical circuits for peripheral neuropathic pain. *J Clin Invest* 126:1983–1997.
- Li H, Xie Y, Zhang N, Yu Y, Zhang Q, Ding S (2015) Disruption of  $\text{IP}_3\text{R}2$ -mediated  $\text{Ca}^{2+}$  signaling pathway in astrocytes ameliorates neuronal death and brain damage while

- reducing behavioral deficits after focal ischemic stroke. *Cell Calcium* 58:565–576.
- Li X, Zima A V., Sheikh F, Blatter LA, Chen J (2005) Endothelin-1–induced arrhythmogenic  $Ca^{2+}$  signaling is abolished in atrial myocytes of inositol-1,4,5-trisphosphate ( $IP_3$ )–receptor type 2–deficient mice. *Circ Res* 96:1274–1281.
- Mashimo M, Okubo Y, Yamazawa T, Yamasaki M, Watanabe M, Murayama T, Iino M (2010) Inositol 1,4,5-trisphosphate signaling maintains the activity of glutamate uptake in Bergmann glia. *Eur J Neurosci* 32:1668–1677.
- Matyash M, Matyash V, Nolte C, Sorrentino V, Kettenmann H (2002) Requirement of functional ryanodine receptor type 3 for astrocyte migration. *FASEB J* 16:84–86.
- Mogami H, Gardner J, Gerasimenko O, Camello P, Petersen O, Tepikin A (1999) Calcium binding capacity of the cytosol and endoplasmic reticulum of mouse pancreatic acinar cells. *J Physiol* 518:463–467.
- Monai H, Ohkura M, Tanaka M, Oe Y, Konno A, Hirai H, Mikoshiba K, Itohara S, Nakai J, Iwai Y, Hirase H (2016) Calcium imaging reveals glial involvement in transcranial direct current stimulation-induced plasticity in mouse brain. *Nat Commun* 7:11100.
- Navarrete M, Perea G, de Sevilla DF, Gómez-Gonzalo M, Núñez A, Martín ED, Araque A (2012) Astrocytes mediate *in vivo* cholinergic-induced synaptic plasticity. *PLoS Biol* 10:e1001259.
- Neher E (1995) The use of fura-2 for estimating Ca buffers and Ca fluxes. *Neuropharmacology* 34:1423–1442.
- Nizar K et al. (2013) *In vivo* stimulus-induced vasodilation occurs without  $IP_3$  receptor activation and may precede astrocytic calcium increase. *J Neurosci* 33:8411–8422.
- Okubo Y, Suzuki J, Kanemaru K, Nakamura N, Shibata T, Iino M (2015) Visualization of  $Ca^{2+}$  filling mechanisms upon synaptic inputs in the endoplasmic reticulum of cerebellar Purkinje cells. *J Neurosci* 35:15837–15846.
- Padmashri R, Suresh A, Boska MD, Dunaevsky A (2015) Motor-skill learning is dependent on astrocytic activity. *Neural Plast* 2015:938023.
- Patrushev I, Gavrillov N, Turlapov V, Semyanov A (2013) Subcellular location of astrocytic calcium stores favors extrasynaptic neuron–astrocyte communication. *Cell Calcium* 54:343–349.
- Paukert M, Agarwal A, Cha J, Doze VA, Kang JU, Bergles DE (2014) Norepinephrine controls astroglial responsiveness to local circuit activity. *Neuron* 82:1263–1270.
- Paumgartner D, Lusa G, Weibel ER (1981) Resolution effect on the stereological estimation of surface and volume and its interpretation in terms of fractal dimensions. *J Microsc* 121:51–63.

- Perez-Alvarez A, Navarrete M, Covelo A, Martin ED, Araque A (2014) Structural and functional plasticity of astrocyte processes and dendritic spine interactions. *J Neurosci* 34:12738–12744.
- Petravicz J, Boyt KM, McCarthy KD (2014) Astrocyte IP<sub>3</sub>R2-dependent Ca<sup>2+</sup> signaling is not a major modulator of neuronal pathways governing behavior. *Front Behav Neurosci* 8:384.
- Petravicz J, Fiacco TA, McCarthy KD (2008) Loss of IP<sub>3</sub> receptor-dependent Ca<sup>2+</sup> increases in hippocampal astrocytes does not affect baseline CA1 pyramidal neuron synaptic activity. *J Neurosci* 28:4967–4973.
- Rakers C, Petzold GC (2016) Astrocytic calcium release mediates peri-infarct depolarizations in a rodent stroke model. *J Clin Invest* 127:511–516.
- Rizzuto R, Pinton P, Carrington W, Fay FS, Fogarty KE, Lifshitz LM, Tuft RA, Pozzan T (1998) Close contacts with the endoplasmic reticulum as determinants of mitochondrial Ca<sup>2+</sup> responses. *Science* 280:1763–1766.
- Rizzuto R, Pozzan T (2006) Microdomains of intracellular Ca<sup>2+</sup>: molecular determinants and functional consequences. *Physiol Rev* 86:369–408.
- Rungta RL, Bernier L-P, Dissing-Olesen L, Groten CJ, LeDue JM, Ko R, Drissler S, MacVicar BA (2016) Ca<sup>2+</sup> transients in astrocyte fine processes occur via Ca<sup>2+</sup> influx in the adult mouse hippocampus. *Glia* 64:2093–2103.
- Saito K, Shigetomi E, Yasuda R, Sato R, Nakano M, Tashiro K, Tanaka KF, Ikenaka K, Mikoshiba K, Mizuta I, Yoshida T, Nakagawa M, Mizuno T, Koizumi S (2018) Aberrant astrocyte Ca<sup>2+</sup> signals “AxCa signals” exacerbate pathological alterations in an Alexander disease model. *Glia* 66:1053–1067.
- Savtchouk I, Volterra A (2018) Gliotransmission: beyond black-and-white. *J Neurosci* 38:14–25.
- Sharp AH, Nucifora FC, Blondel O, Sheppard CA, Zhang C, Snyder SH, Russell JT, Ryugo DK, Ross CA (1999) Differential cellular expression of isoforms of inositol 1,4,5-triphosphate receptors in neurons and glia in brain. *J Comp Neurol* 406:207–220.
- Sherwood MW, Arizono M, Hisatsune C, Bannai H, Ebisui E, Sherwood JL, Panatier A, Oliet SHR, Mikoshiba K (2017) Astrocytic IP<sub>3</sub>Rs: contribution to Ca<sup>2+</sup> signalling and hippocampal LTP. *Glia* 65:502–513.
- Shigetomi E, Bushong EA, Hausteiner MD, Tong X, Jackson-Weaver O, Kracun S, Xu J, Sofroniew M V., Ellisman MH, Khakh BS (2013) Imaging calcium microdomains within entire astrocyte territories and endfeet with GCaMPs expressed using adeno-associated viruses. *J Gen Physiol* 141:633–647.

- Shigetomi E, Tong X, Kwan KY, Corey DP, Khakh BS (2012) TRPA1 channels regulate astrocyte resting calcium and inhibitory synapse efficacy through GAT-3. *Nat Neurosci* 15:70–80.
- Srinivasan R, Huang BS, Venugopal S, Johnston AD, Chai H, Zeng H, Golshani P, Khakh BS (2015)  $\text{Ca}^{2+}$  signaling in astrocytes from *Ip3r2*<sup>-/-</sup> mice in brain slices and during startle responses *in vivo*. *Nat Neurosci* 18:708–717.
- Suzuki J, Kanemaru K, Iino M (2016) Genetically encoded fluorescent indicators for organellar calcium imaging. *Biophys J* 111:1119–1131.
- Suzuki J, Kanemaru K, Ishii K, Ohkura M, Okubo Y, Iino M (2014) Imaging intraorganellar  $\text{Ca}^{2+}$  at subcellular resolution using CEPIA. *Nat Commun* 5:4153.
- Takata N, Mishima T, Hisatsune C, Nagai T, Ebisui E, Mikoshiba K, Hirase H (2011) Astrocyte calcium signaling transforms cholinergic modulation to cortical plasticity *in vivo*. *J Neurosci* 31:18155–18165.
- Takata N, Nagai T, Ozawa K, Oe Y, Mikoshiba K, Hirase H (2013) Cerebral blood flow modulation by basal forebrain or whisker stimulation can occur independently of large cytosolic  $\text{Ca}^{2+}$  signaling in astrocytes. *PLoS One* 8:e66525.
- Tamamushi S, Nakamura T, Inoue T, Ebisui E, Sugiura K, Bannai H, Mikoshiba K (2012) Type 2 inositol 1,4,5-trisphosphate receptor is predominantly involved in agonist-induced  $\text{Ca}^{2+}$  signaling in Bergmann glia. *Neurosci Res* 74:32–41.
- Verkhratsky A, Orkand RK, Kettenmann H (1998) Glial calcium: homeostasis and signaling function. *Physiol Rev* 78:99–141.
- Volterra A, Meldolesi J (2005) Astrocytes, from brain glue to communication elements: the revolution continues. *Nat Rev Neurosci* 6:626–640.
- Wang F, Smith NA, Xu Q, Fujita T, Baba A, Matsuda T, Takano T, Bekar L, Nedergaard M (2012a) Astrocytes modulate neural network activity by  $\text{Ca}^{2+}$ -dependent uptake of extracellular  $\text{K}^+$ . *Sci Signal* 5:ra26.
- Wang F, Xu Q, Wang W, Takano T, Nedergaard M (2012b) Bergmann glia modulate cerebellar Purkinje cell bistability via  $\text{Ca}^{2+}$ -dependent  $\text{K}^+$  uptake. *Proc Natl Acad Sci U S A* 109:7911–7916.
- Yamamoto-Hino M, Miyawaki A, Kawano H, Sugiyama T, Furuichi T, Hasegawa M, Mikoshiba K (1995) Immunohistochemical study of inositol 1,4,5-trisphosphate receptor type 3 in rat central nervous system. *Neuroreport* 6:273–276.
- Yang J, Yang H, Liu Y, Li X, Qin L, Lou H, Duan S, Wang H (2016) Astrocytes contribute to synapse elimination *via* type 2 inositol 1,4,5-trisphosphate receptor-dependent release of ATP. *Elife* 5:e15043.

Zhang Y, Chen K, Sloan SA, Bennett ML, Scholze AR, O’Keeffe S, Phatnani HP, Guarnieri P, Caneda C, Ruderisch N, Deng S, Liddelow SA, Zhang C, Daneman R, Maniatis T, Barres BA, Wu JQ (2014) An RNA-sequencing transcriptome and splicing database of glia, neurons, and vascular cells of the cerebral cortex. *J Neurosci* 34:11929–11947.



## Figure legends

Figure 1.  $\text{Ca}^{2+}$  imaging within the ER of cortical astrocytes using G-CEPIA1*er*.

(A) Immunohistochemical analysis of G-CEPIA1*er*-expressing astrocytes in the cortex.

G-CEPIA1*er* shows colocalization with the astrocyte marker GFAP. Scale bar, 20  $\mu\text{m}$ .

(B) SERCA inhibitor-induced  $\text{Ca}^{2+}$  depletion confirmed that G-CEPIA1*er* reflected  $[\text{Ca}^{2+}]_{\text{ER}}$ .

Representative  $\Delta F/F_0$  traces and summarized graphs indicated the same amplitude of

G-CEPIA1*er* fluorescence decrease upon application of CPA (50  $\mu\text{M}$ , gray bar) to WT (black trace) and IP<sub>3</sub>R2-KO (magenta trace) astrocytes. A whole astrocyte was selected as the region of interest to measure  $\Delta F/F_0$ .  $n = 23$  cells for WT and 21 cells for IP<sub>3</sub>R2-KO (mean  $\pm$  s.e.m.).

Figure 2. IP<sub>3</sub>R2-independent  $\text{Ca}^{2+}$  release in cortical astrocytes.

(A) Representative G-CEPIA1*er* responses in the soma and processes upon application of NE (10  $\mu\text{M}$ , cyan bars) to WT (black traces) and IP<sub>3</sub>R2-KO (magenta traces) astrocytes in cortical slices. Regions enclosed by yellow circles in left images indicate the somatic and process regions of interest for  $\Delta F/F_0$  traces. Scale bar, 10  $\mu\text{m}$ .

(B) G-CEPIA1*er* responses in the soma and processes upon application of NE (10  $\mu\text{M}$ , cyan bars) to WT (black) and IP<sub>3</sub>R2-KO (magenta) astrocytes. Individual  $\Delta F/F_0$  traces (pale color) and average traces (deep color) are indicated.  $n = 11$  cells for WT and 12 cells for IP<sub>3</sub>R2-KO.

(C) ER-YFP showed no response to NE (10  $\mu\text{M}$ , cyan bars) in both WT (black) and IP<sub>3</sub>R2-KO (magenta) astrocytes, indicating no  $\text{Ca}^{2+}$ -independent changes of fluorescent proteins. A whole astrocyte was selected as the region of interest to measure  $\Delta F/F_0$ .

Individual  $\Delta F/F_0$  traces (pale color) and average traces (deep color) are indicated.  $n = 12$  cells for WT and 10 cells for IP<sub>3</sub>R2-KO.

(D) Summarized graph of the response amplitudes of  $\Delta F/F_0$  traces shown in (B) and (C) (mean  $\pm$  s.e.m.), indicating attenuated but significant G-CEPIA1*er* responses in IP<sub>3</sub>R2-KO

astrocytes as well as the same responses between the soma and processes.

Figure 3. Spontaneous ER  $\text{Ca}^{2+}$  release in cortical astrocytes.

(A) Representative spontaneous G-CEPIA1*er* responses that emerged synchronously throughout a WT astrocyte (global response). The yellow circle enclosing an astrocyte in the left image indicates the region of interest for the bottom  $\Delta F/F_0$  trace. Pseudocolor images indicate the average of  $\Delta F/F_0$  in five consecutive frames at the time points indicated by gray bars in the bottom  $\Delta F/F_0$  trace. Scale bar, 20  $\mu\text{m}$ .

(B) Representative spontaneous G-CEPIA1*er* responses that emerged in confined regions of processes in a WT astrocyte (process-localized response). Yellow circles and numbers in the left image correspond to the bottom  $\Delta F/F_0$  traces. Pseudocolor  $\Delta F/F_0$  images indicate the spatiotemporal distribution of responses. Scale bar, 20  $\mu\text{m}$ .

(C) Representative non-spontaneous G-CEPIA1*er* responses in an IP<sub>3</sub>R2-KO astrocyte. The yellow circle enclosing an astrocyte in the left image indicates the region of interest for the bottom  $\Delta F/F_0$  trace. Pseudocolor  $\Delta F/F_0$  images indicate no response. Scale bar, 20  $\mu\text{m}$ .

(D) Summary of frequencies (left) and amplitudes (right) of global and process-localized responses in WT astrocytes.  $n = 25$  global responses and 27 process-localized responses in 15 cells (mean  $\pm$  s.e.m.).

Figure 4. Cytosolic  $\text{Ca}^{2+}$  transients induced by IP<sub>3</sub>R2-independent  $\text{Ca}^{2+}$  release.

(A) GCaMP6f-expressing astrocyte. Scale bar, 10  $\mu\text{m}$ .

(B) GCaMP6f responses upon application of NE (10  $\mu\text{M}$ , cyan bars) to WT (black) and IP<sub>3</sub>R2-KO (magenta) astrocytes in the control condition [CPA (-)] or after treatment with CPA [CPA (+)]. A whole astrocyte was selected as the region of interest to measure  $\Delta F/F_0$ . Individual  $\Delta F/F_0$  traces (pale color) and average traces (deep color) are indicated.  $n = 13$  cells

for WT [CPA (-)], 10 cells for WT [CPA (+)], 16 cells for IP<sub>3</sub>R2-KO [CPA (-)], and 10 cells for IP<sub>3</sub>R2-KO [CPA (+)].

(C) Summarized graph of the response amplitudes of  $\Delta F/F_0$  traces shown in (B) (mean  $\pm$  s.e.m.), indicating weak GCaMP6f responses in IP<sub>3</sub>R2-KO astrocytes. Abolishment of responses by CPA indicated the contribution of ER Ca<sup>2+</sup> release to GCaMP6f responses.

Figure 5. Mitochondrial Ca<sup>2+</sup> transients induced by IP<sub>3</sub>R2-independent Ca<sup>2+</sup> release.

(A) CEPIA2*mt*-expressing astrocyte. Scale bar, 10  $\mu$ m.

(B) CEPIA2*mt* responses upon application of NE (10  $\mu$ M, cyan bars) to WT (black) and IP<sub>3</sub>R2-KO (magenta) astrocytes in the control condition [CPA (-)] or after treatment with CPA [CPA (+)]. A whole astrocyte was selected as the region of interest to measure  $\Delta F/F_0$ . Individual  $\Delta F/F_0$  traces (pale color) and average traces (deep color) are indicated.  $n = 18$  cells for WT [CPA (-)], 10 cells for WT [CPA (+)], 16 cells for IP<sub>3</sub>R2-KO [CPA (-)], and 12 cells for IP<sub>3</sub>R2-KO [CPA (+)].

(C) Summarized graph of the response amplitudes of  $\Delta F/F_0$  traces shown in (B) (mean  $\pm$  s.e.m.), indicating attenuated but significant CEPIA2*mt* responses in IP<sub>3</sub>R2-KO astrocytes. Abolishment of responses by CPA indicated the contribution of ER Ca<sup>2+</sup> release to CEPIA2*mt* responses.

Figure 6. IP<sub>3</sub>R2-independent Ca<sup>2+</sup> release in hippocampal astrocytes.

(A) Representative spontaneous global G-CEPIA1*er* responses in a hippocampal WT astrocyte. The yellow circle enclosing an astrocyte in the left image indicates the region of interest for the  $\Delta F/F_0$  trace. Scale bar, 10  $\mu$ m.

(B) Representative spontaneous process-localized G-CEPIA1*er* responses in a hippocampal WT astrocyte. Yellow circles and numbers in the left image correspond to the  $\Delta F/F_0$  traces.

Scale bar, 10  $\mu\text{m}$ .

(C) Representative non-spontaneous G-CEPIA1*er* responses in a hippocampal IP<sub>3</sub>R2-KO astrocyte. The yellow circle enclosing an astrocyte in the left image indicates the region of interest for the  $\Delta F/F_0$  trace. Scale bar, 10  $\mu\text{m}$ .

(D) Summary of frequencies and amplitudes (E) of global and process-localized responses in hippocampal WT astrocytes.  $n = 29$  global responses and 27 process-localized responses in 16 cells (mean  $\pm$  s.e.m.).

(E) G-CEPIA1*er* responses upon application of NE (10  $\mu\text{M}$ , cyan bars) to WT (black) and IP<sub>3</sub>R2-KO (magenta) astrocytes. A whole astrocyte was selected as the region of interest to measure  $\Delta F/F_0$ . Individual  $\Delta F/F_0$  traces (pale color) and average traces (deep color) are indicated.  $n = 16$  cells for WT and 18 cells for IP<sub>3</sub>R2-KO. Left graph is a summary of the response amplitudes of  $\Delta F/F_0$  traces (mean  $\pm$  s.e.m.), indicating attenuated but significant G-CEPIA1*er* responses in IP<sub>3</sub>R2-KO astrocytes.

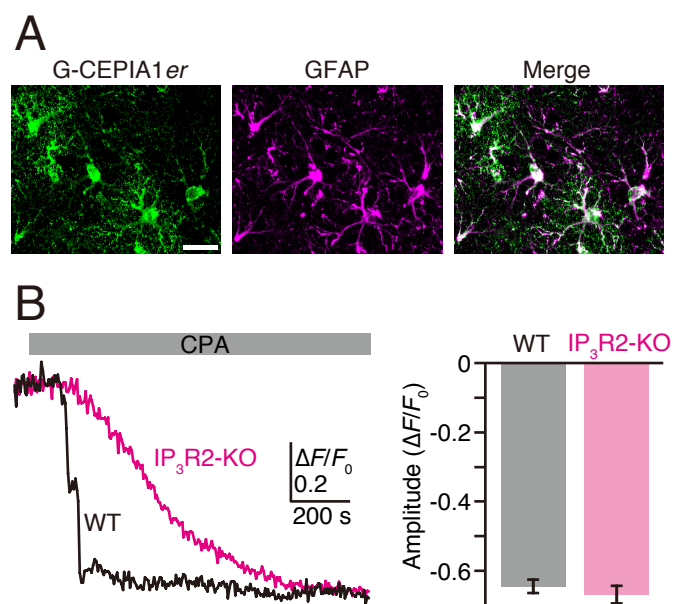

Fig. 1

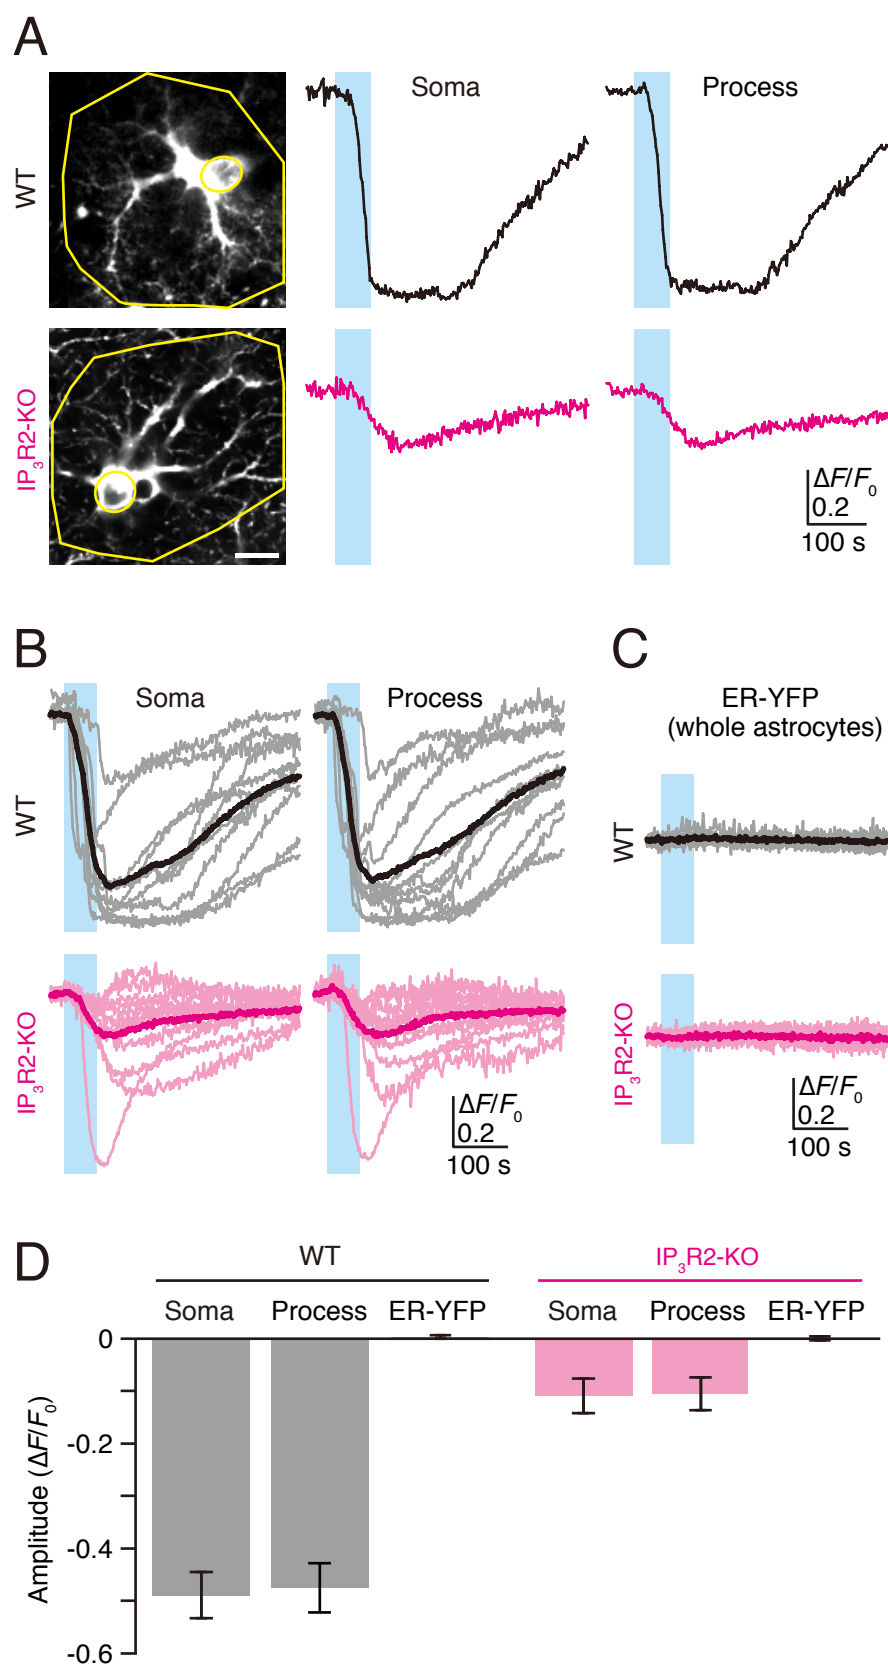

Fig. 2

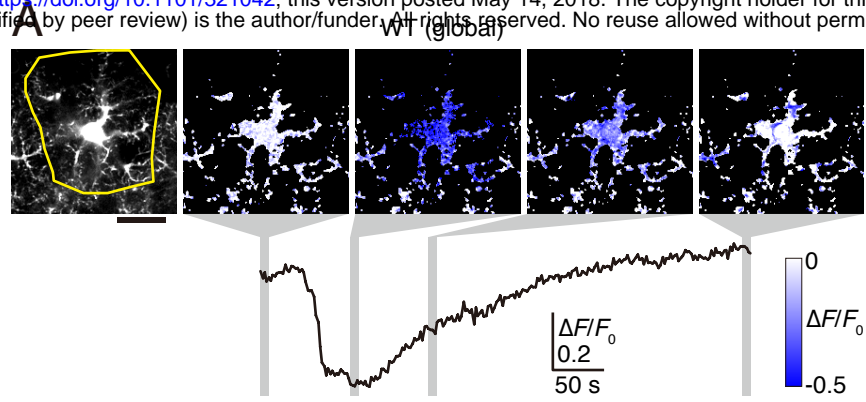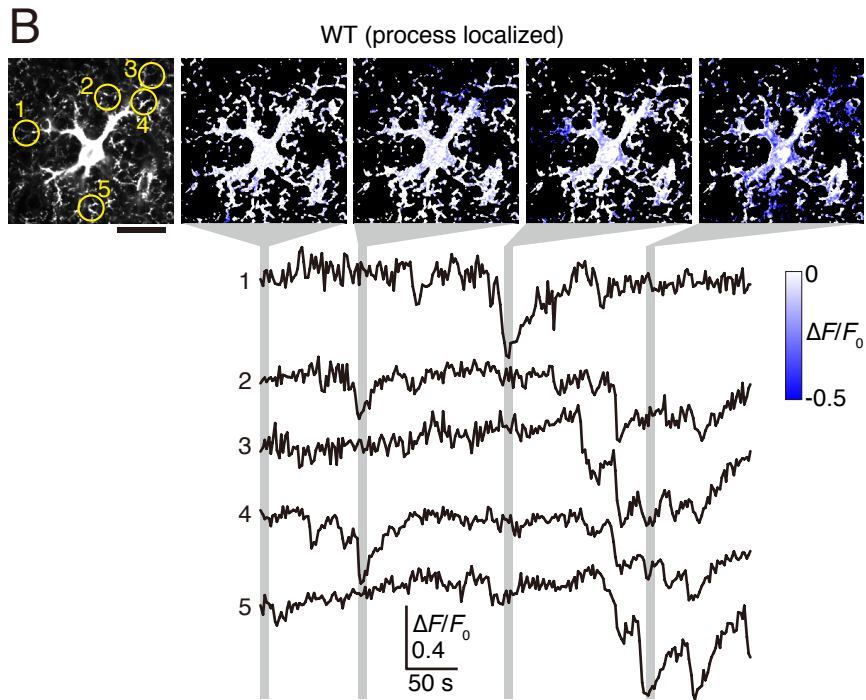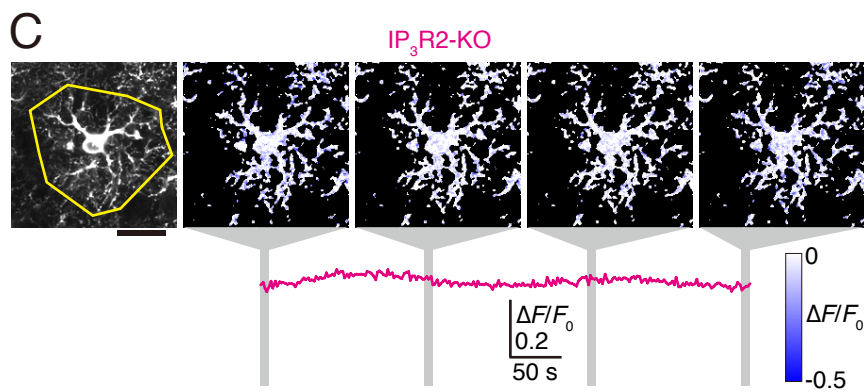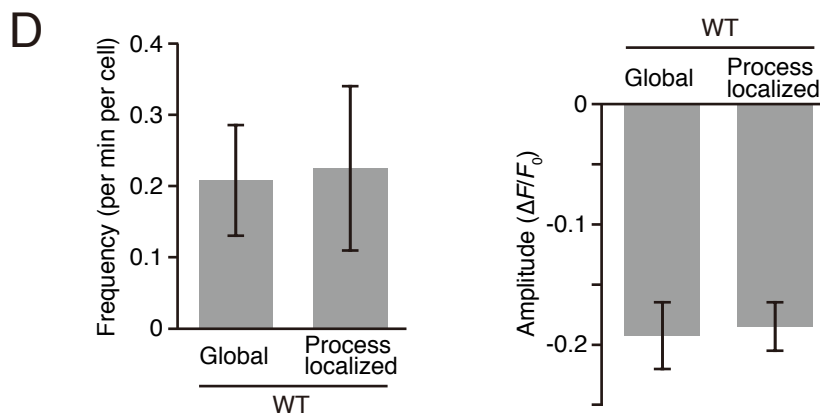

Fig. 3

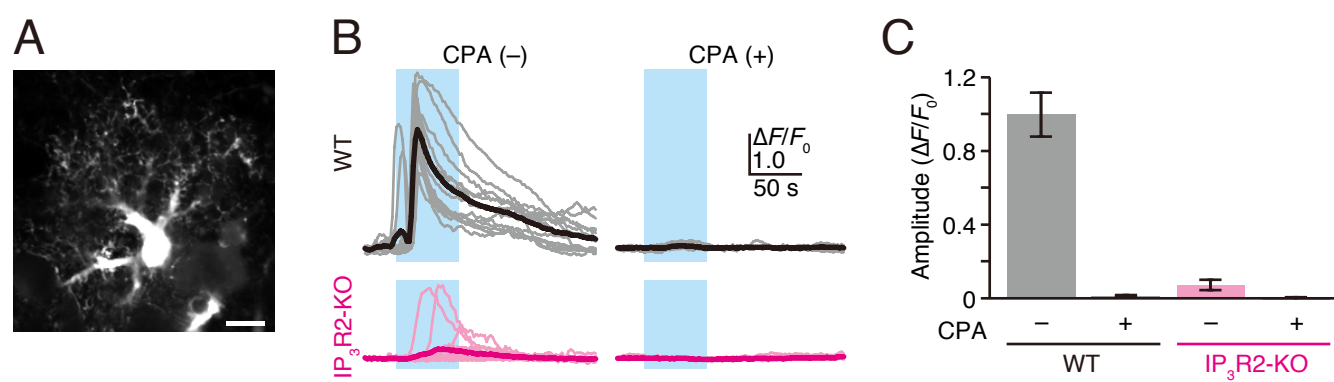

Fig. 4



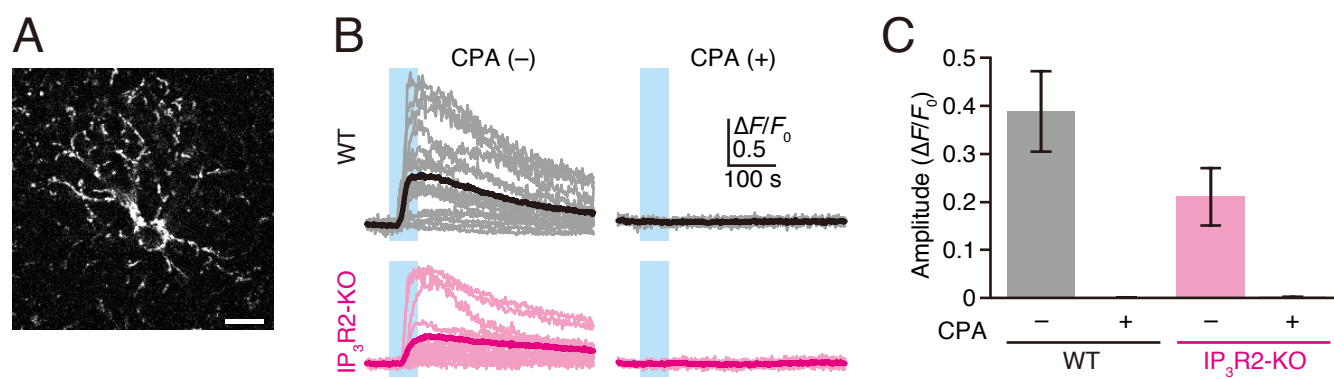

Fig. 5

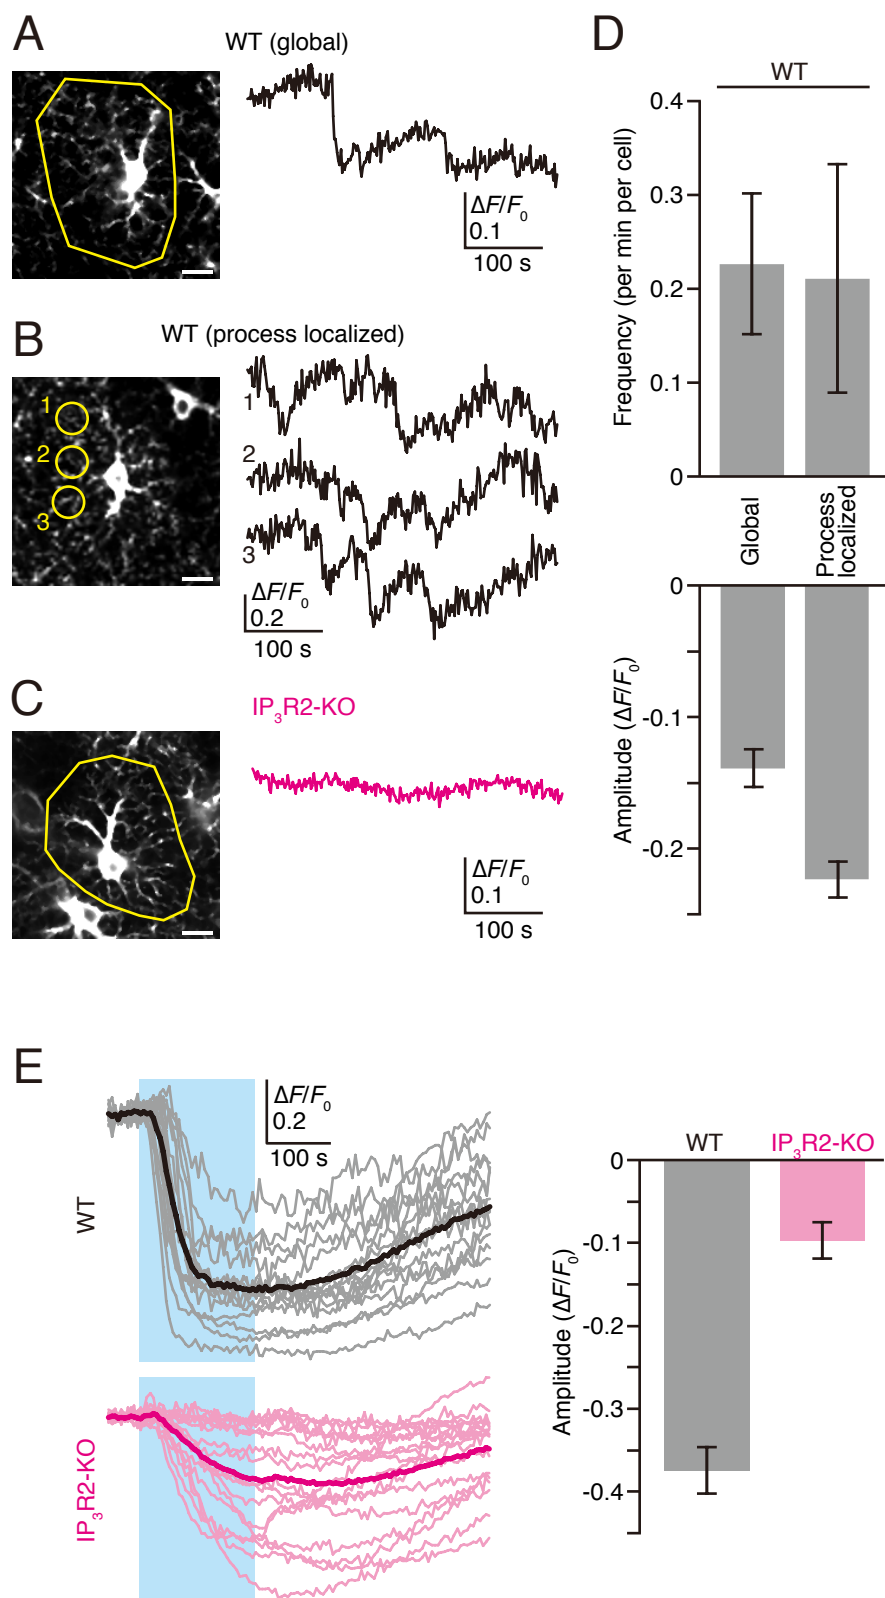

Fig. 6
